# Supplementary material for: Long-term follow-up of Chinese patients with methylmalonic acidemia of the cblC and mut subtypes
Source: Springer Nature journal article supplement (doi:10.1038/s41390-024-03581-x), 2024-09-21

## SUPPLEMENTAL MATERIAL

**Fig. S1** The prognosis of the patients in the cohort. Summary of the NBS status, disease onset, treatment and clinical outcome for the patients with cblC-MMA (left) and mut-MMA (right) in this study.

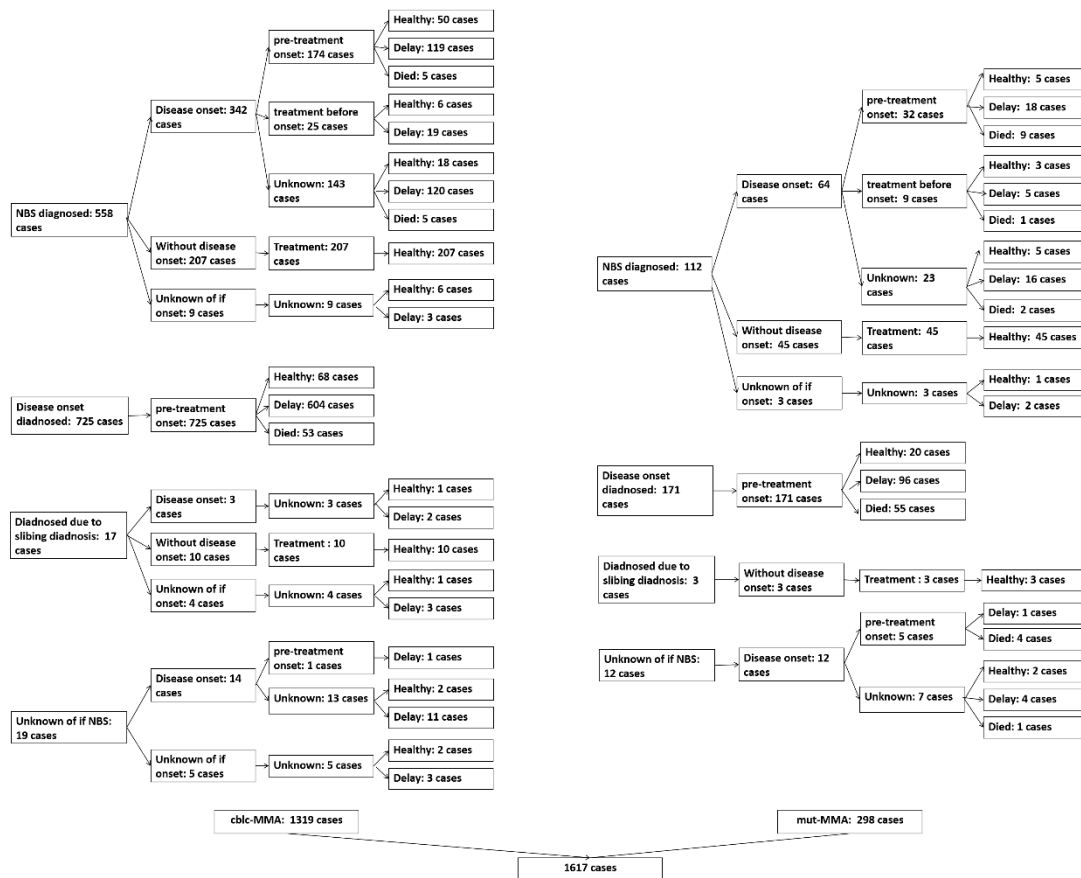

Supplement: MOESM2 [file 41390_2024_3581_MOESM2_ESM.pdf]
